# Supplementary material
Source: PubMed Central journal article supplement (PMC1768150)
Supplement: heart_90_4_457__1.pdf [file heart_90_4_457__1.pdf]

### Web-only References

1. Arbogast R, Bourassa MG. Myocardial function during atrial pacing in patients with angina pectoris and normal coronary arteriograms. Comparison with patients having significant coronary artery disease. *Am J Cardiol* 1973;32:257-63.
2. Arroyo-Espliguero R, Mollicelli N, Avanzas P, Emmanouil Z, Newey VR, Nassiri DK, Kaski JC. Chronic inflammation and increased arterial stiffness in patients with cardiac syndrome X. *Eur Heart Journal* 2003;24:2006-11.
3. Bøtker HE, Moller N, Ovesen P, et al. Insulin resistance in microvascular angina (syndrome X) *Lancet* 1993;342:136-40.
4. Bøttcher M, Bøtker HE, Sonne H, et al. Endothelium-dependent and -independent perfusion reserve and the effect of L-arginine on myocardial perfusion in patients with syndrome X. *Circulation* 1999;99:1795-801.
5. Boudoulas H, Cobb TC, Leighton RF, et al. Myocardial lactate production in patients with angina-like chest pain and angiographically normal coronary arteries and left ventricle. *Am J Cardiol*;34:501-5.
6. Bugiardini R, Borghi A, Pozzati A, et al. The paradox of nitrates in patients with angina pectoris and angiographically normal coronary arteries. *Am J Cardiol* 1993;72:343-7.
7. Bugiardini R, Pozzati A, Ottani F, et al. Vasotonic angina: a spectrum of ischemic syndromes involving functional abnormalities of the epicardial and microvascular coronary circulation. *J Am Coll Cardiol* 1993;22:417-25.

8. Camici PG, Marraccini P, Lorenzoni R, et al. Coronary hemodynamics and myocardial metabolism in patients with syndrome X: response to pacing stress. *J Am Coll Cardiol*;17:1461-70.
9. Cannon RO 3rd, Quyyumi AA, Mincemoyer R, et al. Imipramine in patients with chest pain despite normal coronary angiograms. *N Engl J Med*. 1994;330:1411-7.
10. Cannon RO 3rd, Quyyumi AA, Schenke WH, et al. Abnormal cardiac sensitivity in patients with chest pain and normal coronary arteries. *J Am Coll Cardiol*. 1990;16:1359-66.
11. Cannon RO, Epstein SE. "Microvascular angina" as a cause of chest pain with angiographically normal coronary arteries. *Am J Cardiol* 1988;61:1338-43.
12. Chauhan A, Mullins PA, Taylor G, et al.. Effect of hyperventilation and mental stress on coronary blood flow in syndrome X. *Br Heart J* 1993;69:516-24.
13. Chauhan A, Mullins PA, Thuraisingham SI, Taylor G, Petch MC, Schofield PM. Effect of transcutaneous electrical nerve stimulation on coronary blood flow. *Circulation* 1994;89:694-702.
14. Conti E, Andreotti F, Sestito A, et al. Reduced levels of insulin-like growth factor-1 in patients with angina pectoris, positive exercise stress test, and angiographically normal epicardial coronary arteries. *Am J Cardiol* 2002;89:973-5.
15. Cox ID, Botker HE, Bagger JP, et al. Elevated endothelin concentrations are associated with reduced coronary vasomotor responses in patients with chest pain and normal coronary arteriograms. *J Am Coll Cardiol* 1999;34:455-60.

16. Crake T, Canepa-Anson R, Shapiro L, et al. Continuous recording of coronary sinus oxygen saturation during atrial pacing in patients with coronary artery disease or with syndrome X. *Br Heart J* 1988;59:31-8.
17. Desideri G, Gaspardone A, Gentile M, et al. Endothelial activation in patients with cardiac syndrome X. *Circulation*. 2000;102:2359-64.
18. Egashira K, Inou T, Hirooka Y, et al. Evidence of impaired endothelium-dependent coronary vasodilation in patients with angina pectoris and normal coronary angiograms. *N Engl J Med* 1993;328:1659-64.
19. Emdin M, Picano E, Lattanzi F, et al. Improved exercise capacity with acute aminophylline administration in patients with syndrome X. *J Am Coll Cardiol* 1989; 14:1450-3.
20. Geltman EM, Henes CG, Senneff MJ, et al. Increased myocardial perfusion at rest and diminished perfusion reserve in patients with angina and angiographically normal coronary arteries. *J Am Coll Cardiol* 1990;16:586-95.
21. Juelsgaard P, Sand NPR. Somatic and social prognosis of patients with angina pectoris and normal coronary angiography: a follow-up study. *Int J Cardiol* 1993;39:49-57.
22. Kayikcioglu M, Payzin S, Yavuzgil O, Kultursay H, Can LH, Soydan I. Benefits of statin treatment in cardiac syndrome X. *Eur Heart J* 2003;24:1999-2005
23. Kaski JC, Elliott PM, Salomone O, et al. Concentration of circulating plasma endothelin in patients with angina and normal coronary angiograms. *Br Heart J* 1995;74:620-5.

24. Kaski JC, Rosano G, Gavrielides S, et al. Effects of angiotensin-converting enzyme inhibition on exercise-induced angina and ST segment depression in patients with microvascular angina. *J Am Coll Cardiol* 1994;23:652-657.
25. Kaul S, Newell JB, Chesler DA, et al. Quantitative thallium imaging findings in patients with normal coronary angiographic findings and in clinically normal subjects. *Am J Cardiol* 1986; 57:509-12.
26. Kemp HG Jr, Vokonas PS, Cohn PF, et al. The anginal syndrome associated with normal coronary arteriograms. Report of a six year experience. *Am J Med* 1973;54:735-42.
27. Koren W, Koldanov R, Peleg E, et al. Enhanced red cell sodium-hydrogen exchange in microvascular angina. *Eur Heart J* 1997; 18:1296-1299
28. Lanza GA, Manzoli A, Pasceri V, Colonna G, Cianflone D, Crea F, Maseri A. Ischemic-like ST-segment Changes During Holter Monitoring in Patients With Angina Pectoris and Normal Coronary Arteries but Negative Exercise Testing. *Am J Cardiol* 1997;79:1-6.
29. Lanza GA, Colonna G, Pasceri V, et al. Atenolol-vs-Amlodipine-vs-Isosorbide-5-Mononitrate on Anginal Symptoms in Syndrome X. *Am J Cardiol* 1999;84:854-6.
30. Lanza GA, Crea F. The complex link between brain and heart in syndrome X. *Heart* 2002.
31. Lanza GA, Gaspardone A, Pasceri V, et al. Effects of Bamiphylline on Exercise Testing in Patients With Syndrome X. *G Ital Cardiol* 1997;27:50-4.

32. Lanza GA, Manzoli A, Pasceri V, et al. Ischemic-like ST-segment changes during Holter monitoring in patients with angina pectoris and normal coronary arteries but negative exercise testing. *Am J Cardiol* 1997;79:1-6.
33. Likoff W, Segal BL, Kasparian H. Paradox of normal selective coronary arteriograms in patients considered to have unmistakable coronary heart disease. *N Engl J Med* 1967;276:1063-6.
34. Meeder JG, Blanksma PK, van der Wall EE, et al. Coronary vasomotion in patients with syndrome X: evaluation with positron emission tomography and parametric myocardial perfusion imaging. *Eur J Nucl Med*. 1997;24:530-7.
35. Montorsi P, Manfredi M, Loaldi A, et al. Comparison of coronary vasomotor responses to nifedipine in syndrome X and Prinzmetal's angina pectoris. *Am J Cardiol* 1989;63:1198-202.
36. Opherk D, Schuler G, Wetterauer K, et al.. Four-year follow-up study in patients with angina pectoris and normal coronary arteriograms ("syndrome X"). *Circulation* 1989;80:1610-6.
37. Opherk D, Zebe H, Weihe E, et al. Reduced coronary dilator capacity and ultrastructural changes of the myocardium in patients with angina pectoris but normal coronary arteriograms. *Circulation* 1981;63:817-25.
38. Panting JR, Gatehouse PD, Yang GZ, et al. Anormal subendocardial perfusion in cardiac syndrome X detected by cardiovascular magnetic resonance imaging. *N Engl J Med* 2002;346:1948-53.
39. Panza JA, Laurienzo JM, Curiel RV, et al. Investigation of the mechanism of chest pain in patients with angiographically normal coronary arteries using

transesophageal dobutamine stress echocardiography. *J Am Coll Cardiol*.1997;29:293-301.

- Piatti P, Fragasso G, Monti LD, et al. Acute intravenous L-arginine infusion decreases endothelin-1 levels and improves endothelial function in patients with angina pectoris and normal coronary arteriograms: correlation with asymmetric dimethylarginine levels. *Circulation* 2003;107:429-36. 41. Picano E, Lattanzi F, Masini M, et al. Usefulness of a high-dose dipyridamole-echocardiography test for diagnosis of syndrome X. *Am J Cardiol* 1987;60:508-512.
42. Quyyumi AA, Cannon RO 3rd, Panza JA, et al. Endothelial dysfunction in patients with chest pain and normal coronary arteries. *Circulation* 1992;86:1864-71.
43. Rosano GM, Kaski JC, Arie S, et al. Failure to demonstrate myocardial ischaemia in patients with angina and normal coronary arteries. Evaluation by continuous coronary sinus pH monitoring and lactate metabolism. *Eur Heart J* 1996;17:1175-80.
44. Rosano GM, Peters NS, Lefroy D, et al. 17-beta-Estradiol therapy lessens angina in postmenopausal women with syndrome X. *J Am Coll Cardiol* 1996;28:1500-5.
45. Rosen SD, Boyd H, Rhodes CG, et al. Myocardial beta-adrenoceptor density and plasma catecholamines in syndrome X. *Am J Cardiol* 1996;78:37-42.
46. Rosen SD, Uren NG, Kaski JC, et al. Coronary vasodilator reserve, pain perception, and sex in patients with syndrome X. *Circulation* 1994;90:50-60.
47. Sax FL, Cannon RO 3rd, Hanson C, et al. Impaired forearm vasodilator reserve in patients with microvascular angina. Evidence of a generalized disorder of vascular function? *N Engl J Med*. 1987;317:1366-70.

48. Shapiro LM, Crake T, Poole-Wilson PA. Is altered cardiac sensation responsible for chest pain in patients with normal coronary arteries? Clinical observations during cardiac catheterization. *Br Med J* 1988;296:170-1.
49. Tousoulis D, Davies GJ, Asimakopoulos G, et al.. Vascular cell adhesion molecule-1 and intercellular adhesion molecule-1 serum level in patients with chest pain and normal coronary arteries (syndrome X). *Clin Cardiol* 2001;24:301-4.
50. Tweddel AC, Martin W, Hutton I: Thallium scan in syndrome X. *Br Heart J* 1992; 68:48-50.
51. Lanza GA, Sestito A, Cammarota G, et al. Assessment Of Systemic Inflammation And Infective Pathogen Burden In Patients With Cardiac Syndrome X. *Am J Cardiol* 2004. In press.
52. De Candia E, Lanza GA, Romagnoli E, et al. Abnormal pH-sensing of platelet Na<sup>+</sup>/H<sup>+</sup> exchanger in patients with cardiac syndrome X. *Int J Cardiol* 2004; In press.
